1 **Physical activity in adult users of inpatient mental health services: a**  
2 **scoping review**

3

4 Garry A. Tew<sup>1\*</sup>, Emily Peckham<sup>2</sup>, Suzy Ker<sup>3</sup>, Jo Smith<sup>3</sup>, Philip Hodgson<sup>1,3</sup>, Katarzyna K. Machaczek<sup>4</sup>,  
5 Matthew Faires<sup>1</sup>

6

7 <sup>1</sup> Institute for Health and Care Improvement, York St John University

8 <sup>2</sup> School of Medical and Health Sciences, Bangor University

9 <sup>3</sup> Tees Esk and Wear Valleys NHS Foundation Trust

10 <sup>4</sup> College of Health, Wellbeing and Life Sciences, Sheffield Hallam University

11

12 \* Corresponding author

13 E-mail: [g.tew@yorks.ac.uk](mailto:g.tew@yorks.ac.uk) (GT)

14

15 Short title: Physical activity and inpatient mental health services

## 16 **Abstract**

17 People with severe mental illness engage in considerably less physical activity than those without.  
18 They also experience premature mortality of around 10–25 years. A large proportion of these  
19 premature deaths are attributed to modifiable behaviours, including physical activity. The inpatient  
20 environment provides an opportunity to support people to become more physically active; however,  
21 there is limited evidence on which interventions are most successful and what contextual factors  
22 affect their delivery. A scoping review was conducted to help understand the extent and type of  
23 evidence in this area and identify research gaps. We included studies of physical activity in adult  
24 inpatient mental health services published in peer-reviewed journals. Reviews, meta-analyses, and  
25 papers focusing on eating disorder populations were excluded. We searched the MEDLINE, CINAHL,  
26 PsycINFO, ASSIA and Web of Science databases for relevant studies published in English. We  
27 extracted data on study design, participant characteristics, intervention and control conditions, key  
28 findings, and research recommendations. We used a descriptive analytical approach and results are  
29 presented in tables and figures. Of 27,286 unique records screened, 210 reports from 182 studies  
30 were included. Sixty-one studies reported on correlates of physical activity, and 139 studies reported  
31 on physical activity interventions. Most intervention studies used a single-group, pre-post design  
32 (40%) and included fewer than 100 participants (86%). Ninety percent of interventions delivered  
33 physical activity directly to participants, and 50% included group-based sessions. The duration, type,  
34 frequency and intensity of sessions varied. Mental health was the most commonly reported  
35 outcome (64%), whereas physical activity was rarely an outcome (13%). Overall, there is a modest  
36 but growing body of research on physical activity in adult users of inpatient mental health services.  
37 More high-quality trials are needed to advance the field, and future research should target  
38 neglected intervention types, outcomes, populations and settings.

## 39 **Keywords**

40 Exercise, Physical activity, Psychiatric inpatient, Severe mental illness, Scoping review

## 41 **Introduction**

42 People who use mental health services, including people with severe mental illness (SMI),  
43 depression, anxiety or stress disorder and people with alcohol and substance use disorders,  
44 experience worse health outcomes and a shortened life expectancy when compared to people  
45 without these disorders (10-25 years for SMI, 7-20 years for anxiety/stress disorders and alcohol and  
46 substance use disorders) [1-4]. Much of this reduced life expectancy is due to modifiable risk factors  
47 such as engaging in health risk behaviours, one of which is physical inactivity [5-7]; and it has been  
48 reported that between 70 and 75% of people with schizophrenia do not meet public health targets  
49 for physical activity [8]. Yet, physical activity interventions have been shown to improve  
50 cardiometabolic health outcomes in people with mental illnesses and improve symptoms of  
51 depression, cognitive function, feelings of isolation, and quality of life [9-11].

52 Insufficient physical activity and excessive sedentary behaviour in people receiving care for SMI have  
53 been observed in both community and inpatient settings [12,13]. However, the majority of  
54 intervention studies have recruited people receiving care in community and outpatient settings, and  
55 less research has been done in inpatient settings [14]. While some of the reasons for insufficient  
56 physical activity and excessive sedentary behaviour are common across both inpatient and  
57 community settings, such as the sedative effects of psychotropic medicine [15] and mental health  
58 symptoms (lack of motivation, anhedonia, fatigue and negative body image) [13], there are some  
59 unique barriers presented by inpatient settings. For example, lack of appropriate facilities, lack of  
60 suitably trained staff to support physical activity, and restrictions on leave for people detained under  
61 mental health legislation all contribute to decreased opportunities for physical activity in inpatient  
62 settings [16-19]. However, inpatient physical activity programmes provide an opportunity to  
63 improve patients' physical and mental health. For this reason, it is important to have an up-to-date  
64 understanding of the literature on this topic.

65 The scope of inpatient physical activity research is broad, including quantitative or qualitative  
66 research such as randomised controlled trials (RCTs) of physical activity interventions or interviews  
67 with service users exploring their perceptions of physical activity. Studies have also explored  
68 correlates of physical activity or been more intervention-focused. Qualitative studies have examined  
69 the views of patients, carers or healthcare professionals, or a particular subpopulation of patients.  
70 Recent reviews regarding inpatient physical activity have focussed on tightly defined inclusion  
71 criteria leading to the inclusion of specific sets of studies, such as RCTs. These include exercise  
72 interventions in mental health inpatient settings [14], physical activity interventions for patients with  
73 SMI in secure forensic settings [20], and studies aiming to increase or evaluate physical activity in  
74 secure settings [21]. A broader review of inpatient physical activity research, that considers all  
75 inpatient settings and quantitative and qualitative evidence would be advantageous to understand  
76 the current state of the literature and inform future research. A scoping review is a suitable way of  
77 achieving this [22]. Understanding and mapping the available evidence on physical activity in  
78 inpatient settings, including qualitative and quantitative research, is important due to their  
79 complementary nature. They answer different questions about physical activity. For example,  
80 quantitative research can shed light on cause-and-effect relationships between various factors  
81 associated with physical activity, while qualitative research can tell us why this is the case. A scoping  
82 review also provides a means to determine whether there is scope and a need for a systematic  
83 review of a particular type or in a specific area of literature, and to identify gaps in the existing  
84 research base that could be filled by future primary research [22]. The overall aim of this scoping  
85 review was therefore to understand the extent and type of evidence regarding physical activity in  
86 adult users of inpatient mental health services. This included study designs used, primary conditions  
87 of participants, types of outcomes assessed, correlates of physical activity explored, intervention  
88 characteristics, outcomes, and research recommendations.

## 89 **Methods**

90 This scoping review was conducted in accordance with the Joanna Briggs Institute (JBI) methodology  
91 for scoping reviews [23] and reported in accordance with the PRISMA Extension for Scoping Reviews  
92 (PRISMAScR) [24]. A protocol was prepared in advance and published in the Open Science  
93 Framework [25].

94

### 95 **Participants/context**

96 We included studies pertaining to adult ( $\geq 18$  years) users of inpatient mental health services. This  
97 included studies where psychiatric inpatients were the participants and studies where other  
98 stakeholders were involved (e.g., healthcare professionals giving their views regarding services for  
99 psychiatric inpatients). Studies focusing on learning disability populations were included whereas  
100 those focusing on eating disorder populations were excluded because of the unique requirement to  
101 carefully manage energy input/output in these populations. There were no limits on the country of  
102 origin.

103

### 104 **Concept**

105 The phenomenon of interest was physical activity. Physical activity has been defined as any bodily  
106 movement produced by skeletal muscles and requiring energy expenditure [26]. Exercise is a subset  
107 of physical activity that has been defined as any structured and repetitive physical activity that has  
108 an objective of improving or maintaining physical fitness [26]. To address the aims of the review we  
109 took a broad view of physical activity and included studies that had focused on supervised exercise  
110 or promotion of self-managed physical activity.

111

112 **Types of sources**

113 This scoping review included experimental and quasi-experimental study designs such as RCTs, non-  
114 randomised controlled trials, before and after studies and interrupted time-series studies. In  
115 addition, analytical observational studies including prospective and retrospective cohort studies,  
116 case-control studies and analytical cross-sectional studies were included. This review also considered  
117 descriptive observational study designs including case series, individual case reports and descriptive  
118 cross-sectional studies for inclusion. Qualitative studies that utilised various methodologies (e.g.,  
119 phenomenology, grounded theory, ethnography, action research) were also considered. Literature  
120 reviews and meta-analyses were used to identify primary studies, but were excluded from data  
121 analysis. Conference abstracts and opinion papers were also excluded.

122

123 **Search strategy**

124 The search strategy targeted peer-reviewed publications. A pilot search of the MEDLINE database  
125 was undertaken to identify articles on the topic. The text words contained in the titles and abstracts  
126 of relevant articles, and the index terms used to describe them were employed to develop a full  
127 search strategy for the MEDLINE, CINAHL, PsycINFO, ASSIA and Web of Science databases (S1 File).  
128 The search strategy, including all identified keywords and index terms, was adapted for each  
129 included database and/or information source. The database searches were conducted on October  
130 31, 2022 and updated on October 24, 2023. The reference list of all included sources of evidence,  
131 and those of any review articles or meta-analyses, were screened for additional studies. We also  
132 conducted forward citation tracking of included studies using Google Scholar. We only included  
133 studies that were published in English language from 2007 onwards. The latter relates to  
134 amendments in the 1983 Mental Health Act that were made in 2007; prior studies may have  
135 employed different clinical practices and patient populations.

136

137 **Study selection**

138 Following the search, all identified citations were collated and uploaded into Covidence [27], and  
139 duplicates were removed. After a pilot test, the titles and abstracts were screened by pairs of  
140 independent reviewers against the eligibility criteria for the review. Potentially relevant sources  
141 were retrieved in full and assessed in detail against the eligibility criteria by pairs of independent  
142 reviewers. The reasons for excluding sources of evidence in full text that did not meet the eligibility  
143 criteria were documented. Any disagreements that arose between the reviewers at each stage of  
144 the selection process were resolved through discussion or with the aid of additional reviewers.

145

146 **Data extraction**

147 Data were extracted from papers included in the scoping review by pairs of independent reviewers  
148 using a data extraction form developed by the reviewers in Covidence [27], which was based on the  
149 JBI template extraction tool [28]. The form was piloted on twenty papers to ensure it was fit for  
150 purpose.

151 The extracted data encompassed specific details about the participants, concept, context, study  
152 methods, key findings relevant to the review questions, and research recommendations. Any  
153 disagreements between the reviewers were resolved through discussion or with the aid of an  
154 additional reviewer. Due to limited timescales and resources, we did not contact any authors to  
155 request missing or additional data.

156

157 **Data analysis and presentation**

158 A descriptive analytical approach was used to summarise the included studies' contextual, process  
159 and outcome-related data [29,30]. This approach was undertaken to map the key concepts and  
160 available evidence, synthesise existing research findings, and identify research gaps. Physical activity  
161 correlates were categorised based on the Socio-Ecological Model [31–33]. This model was chosen as  
162 it considers the multifaceted and interactive effects of various factors (e.g., interpersonal,  
163 organisational and community), which characterise the delivery of physical activity interventions for  
164 people with SMI. The analysis was reported in accordance with the synthesis without meta-analysis  
165 (SWiM) guideline [34], with data presented in tables and figures where appropriate.



## 166 **Results**

167 Fig 1 shows the PRISMA flow diagram. The database searches yielded 35,278 records. After  
168 removing duplicates, we screened 27,040 records, from which we reviewed 280 full-text reports,  
169 and finally included 132 reports. Later, we reviewed a further 246 full-text reports that were  
170 identified from review articles or the forward and backward citations of included reports. This  
171 resulted in a further 78 reports being included. Together, 210 reports from 182 studies were  
172 included in the review. The complete reference list of included reports can be found in S2 File.

173

174 **Fig 1. PRISMA flow diagram.**

175

### 176 **Descriptive characteristics and methodological information of included articles**

177 Sixty-one (34%) studies reported on correlates of physical activity, 139 (76%) studies reported on  
178 physical activity interventions, and 19 (10%) studies reported on both physical activity correlates and  
179 interventions.

180 Of the 61 studies on correlates of physical activity, 43 (70%) studies reported on quantitative data  
181 (28 observational studies, 15 interventional studies) and 22 (36%) studies reported on qualitative  
182 data (14 observational studies, 8 interventional studies) (Table 1). Sample sizes varied by study type,  
183 with observational quantitative studies including the largest samples. The majority of studies were  
184 conducted in Europe (62%), with most of the remainder originating from Australasia (16%) and Asia  
185 (11%). The three most common settings were psychiatric hospitals (39%), forensic/secure settings  
186 (23%), and 'mixed' settings (16%).

187 Of the 139 studies on interventions (Table 2), 57 (41%) studies used a single-group, pre-post design  
188 and 57 (41%) studies were RCTs. The majority of studies included fewer than 100 participants (86%)

189 and were conducted in Europe (47%) and within a psychiatric hospital (45%). The most common  
190 study populations included people with schizophrenia or related psychotic disorders (35%) and a  
191 mixture of diagnoses (20%). Mental health was the most commonly reported outcome (64%),  
192 whereas physical activity (13%) and quality of life (16%) were rarely reported outcomes (Table 2).

193 Fourteen (10%) of the intervention studies were qualitative studies. All 14 studies collected  
194 qualitative data from service users who had participated in the intervention; seven studies (50%)  
195 also collected data from healthcare staff, and one study (7%) also collected data from family  
196 members. Most studies (71%) used one-to-one interviews to collect data. Other methods included  
197 observations (n=2), evaluation forms (n=2), document analysis (n=1) and focus groups (n=1).

198 **Table 1. Characteristics of studies of physical activity correlates by type of study\*.**

|                                     | Quantitative                                         |                                                     | Qualitative                                      |                                                       | Overall (n=61)                                                              |
|-------------------------------------|------------------------------------------------------|-----------------------------------------------------|--------------------------------------------------|-------------------------------------------------------|-----------------------------------------------------------------------------|
|                                     | Observational (n=28)                                 | Interventional (n=15)                               | Observational (n=14)                             | Interventional (n=8)                                  |                                                                             |
| Sample size                         | 1-100: 11 (39%)<br>101-500: 15 (54%)<br>500+: 2 (7%) | 1-100: 12 (80%)<br>101-500: 3 (20%)<br>500+: 0 (0%) | 1-15: 6 (43%)<br>16+: 8 (57%)<br>Missing: 0 (0%) | 1-15: 3 (37.5%)<br>16+: 4 (50%)<br>Missing: 1 (12.5%) | 1-100: 40 (65.5%)<br>101-500: 18 (29.5%)<br>500+: 2 (3%)<br>Missing: 1 (2%) |
| Continent                           |                                                      |                                                     |                                                  |                                                       |                                                                             |
| Europe                              | 16 (57%)                                             | 12 (80%)                                            | 7 (50%)                                          | 6 (75%)                                               | 38 (62%)                                                                    |
| North America                       | 1 (4%)                                               | 2 (13%)                                             | 0 (0%)                                           | 0 (0%)                                                | 3 (5%)                                                                      |
| South America                       | 0 (0%)                                               | 0 (0%)                                              | 0 (0%)                                           | 0 (0%)                                                | 0 (0%)                                                                      |
| Asia                                | 4 (14%)                                              | 0 (0%)                                              | 2 (14%)                                          | 1 (12.5%)                                             | 7 (11%)                                                                     |
| Australasia                         | 5 (18%)                                              | 1 (7%)                                              | 4 (29%)                                          | 1 (12.5%)                                             | 10 (16%)                                                                    |
| Africa                              | 1 (4%)                                               | 0 (0%)                                              | 1 (7%)                                           | 0 (0%)                                                | 2 (3%)                                                                      |
| Multiple continents                 | 1 (4%)                                               | 0 (0%)                                              | 0 (0%)                                           | 0 (0%)                                                | 1 (2%)                                                                      |
| Setting                             |                                                      |                                                     |                                                  |                                                       |                                                                             |
| Psychiatric hospital                | 13 (46%)                                             | 8 (53%)                                             | 3 (21%)                                          | 3 (37.5%)                                             | 24 (39%)                                                                    |
| General hospital                    | 1 (4%)                                               | 2 (13%)                                             | 1 (7%)                                           | 2 (25%)                                               | 6 (10%)                                                                     |
| Mental health rehabilitation centre | 3 (11%)                                              | 1 (7%)                                              | 0 (0%)                                           | 0 (0%)                                                | 4 (7%)                                                                      |
| Forensic/secure                     | 3 (11%)                                              | 3 (20%)                                             | 5 (36%)                                          | 3 (37.5%)                                             | 14 (23%)                                                                    |
| Mixed                               | 5 (18%)                                              | 1 (7%)                                              | 5 (36%)                                          | 0 (0%)                                                | 10 (16%)                                                                    |
| Other                               | 2 (7%)                                               | 0 (0%)                                              | 0 (0%)                                           | 0 (0%)                                                | 2 (3%)                                                                      |
| Missing                             | 1 (4%)                                               | 0 (0%)                                              | 0 (0%)                                           | 0 (0%)                                                | 1 (2%)                                                                      |

199 \*Numbers are not exclusive – studies can be counted multiple times, for example, if they include both quantitative and qualitative data.

200 **Table 2. Characteristics of studies of physical activity interventions by type of study\*.**

|                                              | <b>Randomised controlled trials (n=57)</b> | <b>Other design (n=84)</b>                                  | <b>Overall (n=139)</b>                                   |
|----------------------------------------------|--------------------------------------------|-------------------------------------------------------------|----------------------------------------------------------|
| Sample size                                  | 1-100: 49 (86%)<br>101-500: 8 (14%)        | 1-100: 71 (84.5%)<br>101-500: 10 (12%)<br>Missing: 3 (3.5%) | 1-100: 119 (86%)<br>101-500: 17 (12%)<br>Missing: 3 (2%) |
| Continent                                    |                                            |                                                             |                                                          |
| Europe                                       | 24 (42%)                                   | 44 (52%)                                                    | 66 (47%)                                                 |
| North America                                | 4 (7%)                                     | 13 (15%)                                                    | 17 (12%)                                                 |
| South America                                | 3 (5%)                                     | 1 (1%)                                                      | 4 (3%)                                                   |
| Asia                                         | 24 (42%)                                   | 13 (15%)                                                    | 37 (27%)                                                 |
| Australasia                                  | 2 (4%)                                     | 12 (14%)                                                    | 14 (10%)                                                 |
| Africa                                       | 0 (0%)                                     | 1 (1%)                                                      | 1 (1%)                                                   |
| Multiple continents                          | 0 (0%)                                     | 0 (0%)                                                      | 0 (0%)                                                   |
| Setting                                      |                                            |                                                             |                                                          |
| Psychiatric hospital                         | 28 (49%)                                   | 35 (42%)                                                    | 63 (45%)                                                 |
| General hospital                             | 16 (28%)                                   | 18 (21%)                                                    | 34 (24%)                                                 |
| Forensic/secure                              | 1 (1%)                                     | 15 (18%)                                                    | 16 (12%)                                                 |
| Mental health rehabilitation centre          | 9 (16%)                                    | 13 (15%)                                                    | 22 (16%)                                                 |
| Mixed                                        | 1 (1%)                                     | 2 (2%)                                                      | 3 (2%)                                                   |
| Other                                        | 2 (4%)                                     | 1 (1%)                                                      | 3 (2%)                                                   |
| Primary condition                            |                                            |                                                             |                                                          |
| Depression or bipolar disorder               | 17 (30%)                                   | 10 (12%)                                                    | 27 (19%)                                                 |
| Schizophrenia or related psychotic disorders | 23 (40%)                                   | 25 (30%)                                                    | 48 (35%)                                                 |
| Post-Traumatic Stress Disorder               | 1 (2%)                                     | 1 (1%)                                                      | 2 (1%)                                                   |
| Dementia                                     | 2 (4%)                                     | 1 (1%)                                                      | 3 (2%)                                                   |
| Substance misuse                             | 4 (7%)                                     | 3 (4%)                                                      | 7 (5%)                                                   |
| Personality disorder                         | 0 (0%)                                     | 1 (1%)                                                      | 1 (1%)                                                   |
| Learning disability                          | 0 (0%)                                     | 1 (1%)                                                      | 1 (1%)                                                   |
| Mixed                                        | 6 (11%)                                    | 22 (26%)                                                    | 28 (20%)                                                 |
| Unclear                                      | 4 (7%)                                     | 20 (24%)                                                    | 24 (17%)                                                 |
| Type of programme                            |                                            |                                                             |                                                          |
| Physical activity delivered                  | 46 (81%)                                   | 67 (80%)                                                    | 113 (81%)                                                |
| Physical activity promoted                   | 7 (12%)                                    | 4 (5%)                                                      | 11 (8%)                                                  |
| Mixed                                        | 3 (5%)                                     | 10 (12%)                                                    | 13 (9%)                                                  |
| Unclear                                      | 1 (2%)                                     | 3 (4%)                                                      | 4 (3%)                                                   |
| Type of physical activity                    |                                            |                                                             |                                                          |
| Various activities                           | 11 (19%)                                   | 22 (26%)                                                    | 33 (24%)                                                 |
| Structured exercise                          | 22 (39%)                                   | 26 (31%)                                                    | 48 (34.5%)                                               |
| Exer-gaming                                  | 1 (2%)                                     | 4 (5%)                                                      | 5 (4%)                                                   |
| Sport                                        | 2 (3.5%)                                   | 8 (9.5%)                                                    | 10 (7%)                                                  |
| Yoga                                         | 3 (5%)                                     | 8 (9.5%)                                                    | 11 (8%)                                                  |
| Unstructured walking/ jogging/ running       | 12 (21%)                                   | 5 (6%)                                                      | 17 (12%)                                                 |
| Dance                                        | 4 (7%)                                     | 6 (7%)                                                      | 8 (6%)                                                   |
| Unclear                                      | 2 (3.5%)                                   | 5 (6%)                                                      | 7 (5%)                                                   |
| Duration of programme                        |                                            |                                                             |                                                          |
| Variable                                     | 0 (0%)                                     | 7 (8%)                                                      | 7 (5%)                                                   |
| Duration of admission                        | 2 (4%)                                     | 17 (20%)                                                    | 19 (14%)                                                 |

|                                        |          |          |            |
|----------------------------------------|----------|----------|------------|
| Fixed (≤6 weeks)                       | 24 (42%) | 8 (9.5%) | 32 (23%)   |
| Fixed (>6 weeks)                       | 26 (46%) | 32 (38%) | 58 (42%)   |
| Single session                         | 5 (9%)   | 11 (19%) | 16 (11.5%) |
| Unclear                                | 0 (0%)   | 9 (11%)  | 9 (6.5%)   |
| <b>Provider</b>                        |          |          |            |
| Study team                             | 15 (26%) | 7 (8%)   | 22 (16%)   |
| Qualified therapist (internal)         | 17 (30%) | 41 (49%) | 58 (42%)   |
| Qualified therapist (external)         | 4 (7%)   | 12 (14%) | 16 (11.5%) |
| Member of staff                        | 7 (12%)  | 9 (11%)  | 16 (11.5%) |
| Member of staff trained by study team  | 3 (5%)   | 4 (5%)   | 7 (5%)     |
| Unclear                                | 12 (21%) | 15 (18%) | 27 (19%)   |
| <b>Who with?</b>                       |          |          |            |
| Individual                             | 7 (12%)  | 10 (12%) | 17 (12%)   |
| Group                                  | 24 (42%) | 45 (54%) | 69 (50%)   |
| Mixed                                  | 4 (7%)   | 9 (11%)  | 13 (9%)    |
| Unclear                                | 22 (39%) | 20 (24%) | 42 (30%)   |
| <b>Comparator</b>                      |          |          |            |
| No comparator                          | 0 (0%)   | 55 (65%) | 55 (40%)   |
| Usual care                             | 25 (44%) | 16 (19%) | 41 (29%)   |
| Other PA intervention                  | 11 (19%) | 4 (5%)   | 15 (11%)   |
| Other non-PA intervention              | 11 (19%) | 6 (7%)   | 17 (12%)   |
| Other PA and usual care                | 6 (11%)  | 2 (2%)   | 8 (6%)     |
| Other non-PA and usual care            | 2 (4%)   | 0 (0%)   | 2 (1%)     |
| Other PA and other non-PA intervention | 1 (2%)   | 0 (0%)   | 1 (1%)     |
| Unclear                                | 1 (2%)   | 1 (1%)   | 2 (1%)     |
| <b>Outcomes</b>                        |          |          |            |
| PA self-report                         | 4 (7%)   | 7 (8%)   | 11 (8%)    |
| PA device-based                        | 2 (3.5%) | 5 (6%)   | 7 (5%)     |
| PA mixed                               | 2 (3.5%) | 2 (2%)   | 4 (3%)     |
| Mental health                          | 40 (70%) | 49 (58%) | 89 (64%)   |
| Physical health                        | 22 (39%) | 29 (35%) | 51 (37%)   |
| Cognition                              | 11 (19%) | 1 (1%)   | 12 (9%)    |
| Quality of life                        | 11 (19%) | 11 (13%) | 22 (16%)   |

201 \*Numbers are not exclusive – studies can be counted multiple times

202 PA, Physical activity

203 **Correlates of physical activity**

204 Tables 3 and 4 summarise the physical activity correlates examined or highlighted in quantitative  
205 and qualitative studies, respectively. A broad range of individual, interpersonal, environmental and  
206 organisational correlates was reported regarding inpatient physical activity, whereas no wider  
207 societal factors were highlighted. 'Health status' and 'medication side effects' were the most  
208 commonly reported demographic and biological factors in both quantitative (23% and 21%,  
209 respectively) and qualitative (55% and 23%, respectively) studies. 'Self-motivation' was the most  
210 common factor in the 'psychological, cognitive and emotional' category (37% quantitative, 45%  
211 qualitative). Factors were less frequently reported in the 'behavioural' and 'social and cultural'  
212 categories, but 'physical activity enjoyment' (7% quantitative, 5% qualitative) and 'social support'  
213 (26% quantitative, 41% qualitative) were the most common factors, respectively. 'Access to  
214 equipment and facilities' (28% quantitative) and 'environment restrictions' (23% quantitative, 32%  
215 qualitative) were commonly cited physical environment factors. 'Staff capacity' (33% quantitative,  
216 82% qualitative) and 'staff capability' (51% quantitative, 59% qualitative) were among the top-  
217 ranking organisational factors.

218 Table 5 summarises the themes of research recommendations from the studies of physical activity  
219 correlates. Twenty-two (36%) of the 61 studies included research recommendations, which we  
220 grouped according to whether they were related to the research topic, research methods, or patient  
221 involvement.

222 **Table 3. Summary of physical activity correlates examined or highlighted in quantitative studies.**

| <b>Factor</b>                                         | <b>Number (%) of studies out of 43</b> |
|-------------------------------------------------------|----------------------------------------|
| <b>Demographic and biological factors</b>             |                                        |
| Health status                                         | 10 (23%)                               |
| Medication side-effects                               | 9 (21%)                                |
| Weight/fatness                                        | 5 (12%)                                |
| Financial status                                      | 4 (9%)                                 |
| Age                                                   | 4 (9%)                                 |
| Gender                                                | 4 (9%)                                 |
| Physical activity status of healthcare staff          | 3 (7%)                                 |
| Education                                             | 3 (7%)                                 |
| Insomnia                                              | 2 (5%)                                 |
| Fitness status                                        | 1 (2%)                                 |
| Diabetes                                              | 1 (2%)                                 |
| Marital status                                        | 1 (2%)                                 |
| Anti-psychotic medication dose                        | 1 (2%)                                 |
| Legal guardianship status                             | 1 (2%)                                 |
| Residential status                                    | 1 (2%)                                 |
| Duration of treatment                                 | 1 (2%)                                 |
| <b>Psychological, cognitive and emotional factors</b> |                                        |
| Self-motivation                                       | 16 (37%)                               |
| Psychological health                                  | 7 (16%)                                |
| Self-efficacy                                         | 7 (16%)                                |
| Attitudes towards physical activity                   | 6 (14%)                                |
| Outcome expectations                                  | 6 (14%)                                |
| Time availability                                     | 5 (12%)                                |
| Mental illness stigma                                 | 5 (12%)                                |
| Mood                                                  | 5 (12%)                                |
| Physical activity knowledge                           | 3 (7%)                                 |
| Fear of injury                                        | 3 (7%)                                 |
| Fatigue/Tiredness                                     | 3 (7%)                                 |
| Value of physical health benefits                     | 2 (5%)                                 |
| Cognitive function                                    | 1 (2%)                                 |
| Fear of going outdoors                                | 1 (2%)                                 |
| Attitudes to staff support                            | 1 (2%)                                 |
| Self-consciousness                                    | 1 (2%)                                 |
| Mental health condition                               | 1 (2%)                                 |
| Severity of dependence                                | 1 (2%)                                 |
| <b>Behavioural factors</b>                            |                                        |
| Physical activity enjoyment                           | 3 (7%)                                 |
| Alcohol use                                           | 3 (7%)                                 |
| Drug use                                              | 2 (5%)                                 |
| Physical activity duration                            | 1 (2%)                                 |
| Physical activity intensity                           | 1 (2%)                                 |
| Physical activity autonomy                            | 1 (2%)                                 |
| Sleep                                                 | 1 (2%)                                 |
| Smoking habits                                        | 1 (2%)                                 |
| Dietary habits                                        | 1 (2%)                                 |
| <b>Social and cultural factors</b>                    |                                        |

|                                               |          |
|-----------------------------------------------|----------|
| Social support from family, friends, or peers | 11 (26%) |
| Staff influence/involvement                   | 5 (12%)  |
| Someone to exercise with                      | 1 (2%)   |
| Acceptance of women exercising                | 1 (2%)   |
| Acceptance of group exercise                  | 1 (2%)   |
| Religious beliefs                             | 1 (2%)   |
| <b>Physical environment factors</b>           |          |
| Access to equipment and facilities            | 12 (28%) |
| Environment restrictions                      | 10 (23%) |
| Safe environment                              | 4 (9%)   |
| Unhealthy environment                         | 2 (5%)   |
| Weather/climate                               | 1 (2%)   |
| Access to green space                         | 1 (2%)   |
| <b>Organisational factors</b>                 |          |
| Staff capability to support physical activity | 22 (51%) |
| Staff availability/capacity                   | 14 (33%) |
| Attitudes to/priority for physical activity   | 10 (23%) |
| Staff responsibility for physical activity    | 6 (14%)  |
| Funding                                       | 6 (14%)  |
| Opportunities for physical activity           | 5 (12%)  |
| Staff confidence to support physical activity | 2 (5%)   |
| Staff working collaboratively                 | 1 (2%)   |
| Staff awareness of physical health issues     | 1 (2%)   |
| Hospital size                                 | 1 (2%)   |
| Safeguarding procedures                       | 1 (2%)   |
| Awareness of opportunities                    | 1 (2%)   |
| Timing of physical activity sessions          | 1 (2%)   |
| Length of inpatient stay                      | 1 (2%)   |



224 **Table 4. Summary of physical activity correlates examined or highlighted in qualitative studies.**

| <b>Factor</b>                                          | <b>Number (%) of studies out of 22</b> |
|--------------------------------------------------------|----------------------------------------|
| Demographic and biological factors                     |                                        |
| Health status                                          | 12 (55%)                               |
| Medication side-effects                                | 5 (23%)                                |
| Psychological, cognitive and emotional factors         |                                        |
| Self-motivation                                        | 10 (45%)                               |
| Mental illness stigma                                  | 7 (32%)                                |
| Value of physical health benefits                      | 7 (32%)                                |
| Psychological health                                   | 3 (14%)                                |
| Time availability                                      | 2 (9%)                                 |
| Cognitive function                                     | 2 (9%)                                 |
| Behavioural factors                                    |                                        |
| Physical activity enjoyment                            | 1 (5%)                                 |
| Physical activity structure (e.g., intensity/duration) | 1 (5%)                                 |
| Perceived suitability of activities                    | 1 (5%)                                 |
| Social and cultural factors                            |                                        |
| Social support from family, friends or peers           | 9 (41%)                                |
| Acceptance of women exercising                         | 1 (5%)                                 |
| Acceptance of group exercise                           | 1 (5%)                                 |
| Physical environment factors                           |                                        |
| Environment restrictions                               | 7 (32%)                                |
| Safe environment                                       | 7 (32%)                                |
| Organisational factors                                 |                                        |
| Staff availability/capacity                            | 18 (82%)                               |
| Funding                                                | 16 (73%)                               |
| Staff capability to support physical activity          | 13 (59%)                               |
| Staff working collaboratively                          | 4 (18%)                                |
| Therapeutic relationship with staff                    | 4 (18%)                                |
| Links to community groups/services                     | 1 (5%)                                 |

225

226 **Tables 5. Themes of research recommendations from studies of physical activity correlates.**

| Theme                                           | Examples of specific research recommendations                                                                                                                                                                                                                                                                                                                                                                                      | Number (%) of articles out of 61 |
|-------------------------------------------------|------------------------------------------------------------------------------------------------------------------------------------------------------------------------------------------------------------------------------------------------------------------------------------------------------------------------------------------------------------------------------------------------------------------------------------|----------------------------------|
| <b>Research topic-related recommendations</b>   |                                                                                                                                                                                                                                                                                                                                                                                                                                    |                                  |
| Investigate other groups                        | <p>“it seems worthwhile to replicate this study in out-patients” (Gerber 2018)</p> <p>“it might be preferable to compare more extreme groups” (Gerber 2018)</p> <p>“subgroups of patients for example, with persons with severe depression” (Ussher 2007)</p>                                                                                                                                                                      | 6 (10%)                          |
| Investigate other correlates                    | <p>“implicit attitudes towards exercise” (Gerber 2018)</p> <p>“consider other comparisons such as by body mass index, perceived physical health or age” (Fraser 2015)</p> <p>“the role of systemic influences on mental health treatment for exercise facilitation” (Ball 2022)</p> <p>“investigation of non-linear relationships between the physical activity and the basic psychological needs is warranted” (Bentzen 2021)</p> | 6 (10%)                          |
| Investigate other setting                       | “consider staff perceptions across other healthcare settings” (Kinnafick 2018)                                                                                                                                                                                                                                                                                                                                                     | 2 (3%)                           |
| <b>Research methods-related recommendations</b> |                                                                                                                                                                                                                                                                                                                                                                                                                                    |                                  |
| Use other data collection methods               | <p>“incorporating objective measurements of physical activity and sedentary behaviour” (Seet 2021)</p> <p>“A more structured questionnaire or short interviews with patients might have allowed for the collection of richer descriptions” (Wynaden 2012)</p> <p>“More extensive interviews with the patients and clinical staff and longer period of participant observation” (Bierski 2016)</p>                                  | 7 (11%)                          |
| Larger studies                                  | <p>“with larger samples of patients” (Ussher 2007)</p> <p>“replicate the findings with larger sample sizes” (Bentzen 2021)</p>                                                                                                                                                                                                                                                                                                     | 5 (8%)                           |
| Longitudinal studies                            | <p>“the examination of cross-lagged relationships between these variables over time” (Gerber 2018)</p> <p>“further (longitudinal) research to obtain more accurate insights on this topic” (Deenik 2017)</p>                                                                                                                                                                                                                       | 5 (8%)                           |
| Intervention studies                            | <p>“explore the most effective exercise promotion strategies for autonomous exercise engagement for long lasting behaviour change” (Kinnafick 2018)</p> <p>“identify effective exercise interventions and feasible delivery models” (Tetlie 2009)</p>                                                                                                                                                                              | 5 (8%)                           |
| Control for additional factors                  | <p>“controlling more systematically for cognitive capacity” (Gerber 2018)</p> <p>“while controlling for the effects of medication and symptom severity” (Seet 2021)</p>                                                                                                                                                                                                                                                            | 2 (3%)                           |
| Explore mechanisms                              | “regarding the mechanisms to modify such views as a means of increasing such care provision” (Bartlem                                                                                                                                                                                                                                                                                                                              | 1 (2%)                           |

|                                                    |                                                                                                                      |        |
|----------------------------------------------------|----------------------------------------------------------------------------------------------------------------------|--------|
|                                                    | 2018)                                                                                                                |        |
| <b>Patient involvement-related recommendations</b> |                                                                                                                      |        |
| Intervention co-produced with patients             | “Patient led ideas and co-design should be key principles in programme and environmental design” (Every-Palmer 2018) | 1 (2%) |

227

228 **Physical activity interventions**

229 The components of physical activity interventions are summarised in Table 2. Most interventions  
230 delivered physical activity directly to participants (90%) and in group-based sessions (50%). Most  
231 physical activity interventions included structured exercise (34.5%) such as aerobic and/or resistance  
232 training, or a variety of physical activities (24%). Fewer studies considered sport- or dance-based  
233 interventions (7% and 6%, respectively). The duration, frequency and intensity of sessions varied  
234 (see Table 2). Most interventions were delivered by health and/or exercise professionals, but few  
235 studies assessed interventions *for* staff. There was also very little evidence on environmental  
236 interventions or interventions that provided participants with physical activity support after  
237 discharge from their inpatient setting.

238 Table 6 summarises the themes of the findings from the 14 qualitative studies, which we grouped  
239 under the headings of ‘perceptions of the intervention’ and ‘factors influencing intervention delivery  
240 and participation’. Beneficial psychosocial effects of interventions were reported in most studies  
241 (79%), such as participants feeling more relaxed, happier and calmer. Several studies reported on a  
242 range of personal and environmental factors that might influence participation in physical activity.  
243 Examples of personal factors included perceived health benefits, social support, medication side  
244 effects, confinement in a locked facility, and the availability of trained staff. Environmental factors  
245 included physical space and facilities.

246 Table 7 summarises the themes of research recommendations from the studies of physical activity  
247 interventions. Forty-nine (35%) of the 139 studies included research recommendations, which we  
248 grouped according to whether they were related to the research topic or research methods. The  
249 most commonly reported research topic-related recommendation was to investigate other physical  
250 activity interventions (11.5%), such as different modes of exercise or different behaviour change  
251 strategies. The most commonly reported research methods-related recommendations were longer  
252 follow-up periods (12%), investigating other outcomes (11.5%), and larger sample sizes (11%).

253 **Table 6. Themes of findings arising from qualitative studies of physical activity interventions.**

| Theme                                                              | Examples of specific findings                                                                                                                                                                                                                                                                                   | Number (%) of articles out of 14 |
|--------------------------------------------------------------------|-----------------------------------------------------------------------------------------------------------------------------------------------------------------------------------------------------------------------------------------------------------------------------------------------------------------|----------------------------------|
| <b>Experiences of the intervention</b>                             |                                                                                                                                                                                                                                                                                                                 |                                  |
| Feasibility and acceptability                                      | “Service users gave positive feedback regarding the programme” (Savage 2009)<br>“The intervention was feasible as part of treatment” (Sorenson 2021)                                                                                                                                                            | 6 (43%)                          |
| Physical impacts                                                   | “Improvements in physical function” (Wright 2009)                                                                                                                                                                                                                                                               | 5 (36%)                          |
| Psychosocial impacts                                               | “participants experienced interconnectedness and developed a mindful stance” (Schulze 2021)<br>“Gaining a sense of competence” (Wright 2009)<br>“more relaxed, happier and calmer after training sessions” (Savage 2009)                                                                                        | 11 (79%)                         |
| <b>Factors influencing intervention delivery and participation</b> |                                                                                                                                                                                                                                                                                                                 |                                  |
| Barriers to participation                                          | “medication side-effects” (Prebble 2011)<br>“the locked environment” (Prebble 2011)<br>“ill health” (Wright 2009)<br>“low confidence” (Wright 2009)<br>“perceived not physically able to undertake some activities” (Wright 2009)<br>“low motivation” (Firth 2017)                                              | 6 (43%)                          |
| Facilitators of participation                                      | “Enjoyment and some autonomy for service users” (Prebble 2011)<br>“physical, mental and social benefits of participating” (Prebble 2011)<br>“staff and patients exercising together” (Tetlie 2009)<br>“exercise being a mandatory part of treatment” (Tetlie 2009)<br>“instructor who is trained” (Tetlie 2009) | 6 (43%)                          |
| Factors impeding implementation/delivery                           | “lack of funding” (Prebble 2011)<br>“staff resistance due to exercise apathy in their own lives” (Prebble 2011)<br>“lack of physical space and facilities” (Prebble 2011)                                                                                                                                       | 2 (14%)                          |

254

255 **Tables 7. Themes of research recommendations from studies of physical activity interventions.**

| Theme                                                    | Examples of specific research recommendations                                                                                                                                                                                                                     | Number (%) of articles out of 139 |
|----------------------------------------------------------|-------------------------------------------------------------------------------------------------------------------------------------------------------------------------------------------------------------------------------------------------------------------|-----------------------------------|
| <b>Research topic-related recommendations</b>            |                                                                                                                                                                                                                                                                   |                                   |
| Investigate other interventions/ intervention components | “Future interventions could use motivational interviewing” (Firth 2017)<br>“the effect of different exercise modes” (Gerber 2018)<br>“explore other ways to foster regular physical exercise” (Burge 2017)                                                        | 16 (11.5%)                        |
| Investigate other groups                                 | “replicated in cohorts with affective disorders” (Stanton 2016a)<br>“Further studies needed in women” (Areshtanab 2020)                                                                                                                                           | 9 (6.5%)                          |
| Investigate mechanisms of effect                         | “consider the impact of symptom severity as a moderator” (Stanton 2016a)<br>“elucidate other ways mindful-yoga impacts patient well-being and treatment” (Spinelli 2020)<br>“explore the mechanisms of improved functional outcomes” (Shimada 2019)               | 6 (4%)                            |
| Investigate optimal exercise strategy                    | “better identify specific exercise types, sets, repetitions, routines” (Tomasi 2019)<br>“clarifying the type and dose of physical activity” (Ng 2007)<br>“determining the ideal window for exercise intervention” (Furzer 2021)                                   | 6 (4%)                            |
| Investigate other setting                                | “it might be better to explore music and exercise interventions in separate study settings to ease the realization of the interventions in a routine clinical setting” (Pitkänen 2019)                                                                            | 1 (1%)                            |
| <b>Research methods-related recommendations</b>          |                                                                                                                                                                                                                                                                   |                                   |
| Longer follow-up                                         | “effect of inpatient self-selected exercise on affect and exercise adherence following discharge” (Stanton 2016a)<br>“a longer follow-up period is needed” (Spinelli 2020)                                                                                        | 17 (12%)                          |
| Investigate other outcomes                               | “consider including measures of affect and arousal” (Stanton 2016a)<br>“other domains like cognitive performance, self-esteem, quality of life, stress and body image” (Roy 2018)<br>“variables such as physiological measures should be included” (Shimada 2019) | 16 (11.5%)                        |
| Larger sample sizes                                      | “Further studies in larger sample sizes are warranted” (Methapatara 2011)<br>“a larger sample size is required” (Shimada 2019)                                                                                                                                    | 15 (11%)                          |
| Use other data collection methods                        | “using objective measures of exercise intensity and sleep quality” (Stanton 2016a)<br>“include more comprehensive quantitative measures” (Spinelli 2020)<br>“using an extensive neuropsychological battery” (Shimada 2019)                                        | 10 (7%)                           |

|                                         |                                                                                                                                                                   |        |
|-----------------------------------------|-------------------------------------------------------------------------------------------------------------------------------------------------------------------|--------|
| Another study including a control group | “using a quiet rest group or an alternate activity group as a comparator” (Stanton 2016a)<br>“a controlled research design” (Spinelli 2020)                       | 8 (6%) |
| Replications/ confirmatory studies      | “More studies to confirm the findings” (Stanton 2016b)<br>“should be replicated in further clinical trial settings” (Thaller 2022)                                | 8 (6%) |
| Control for confounding variables       | “Future studies would need to control for these variables as part of their analysis” (Loh 2015)                                                                   | 3 (2%) |
| Use a ‘sham exercise’ control group     | “Future study designs might include fake conditions, such as ... stretching and gymnastic sessions which do not boost the cardiorespiratory system” (Salehi 2016) | 1 (1%) |

256

## 257 **Discussion**

### 258 **Summary of evidence**

259 This scoping review shows that a wide range of research has been published regarding physical  
260 activity and adult users of inpatient mental health services since 2007.

261 Forty-three quantitative studies explored correlates of physical activity. Organisational factors and  
262 psychological, cognitive and emotional factors were the top two domains cited. Within these, four  
263 out of the top five factors were organisational factors: staff capability, staff capacity, staff attitudes  
264 to physical activity, and access to equipment, while self-motivation was the second most highly cited  
265 correlate of physical activity overall. Similar findings were observed among the 22 qualitative studies  
266 that reported on correlates, with the addition of social support. There was also more emphasis on  
267 stigma, health, value of health and funding for physical activity programmes in the qualitative  
268 studies. Overall, a broad range of correlates have been reported. Given that organisational  
269 correlates were commonly cited, it seems prudent to consider ways to overcome some  
270 organisational barriers in future research and clinical practice.

271 One hundred and thirty-nine interventional studies were identified; only eight of these were larger-  
272 scale RCTs with 100 or more participants, and long-term follow-up was rare. We did not identify any  
273 studies that included an economic evaluation, and there were few replications, suggesting that it  
274 would be challenging to evaluate the clinical and cost-effectiveness of physical activity interventions  
275 within the current evidence.

276 In terms of intervention design, the majority of studies explored an intervention that involved  
277 delivering physical activity (81%) rather than promoting physical activity (8%); 9% used a mixed  
278 model of both delivering and promoting physical activity. Interventions were mainly limited to the  
279 period of inpatient stay, and there was little information on how the person might maintain their  
280 levels of physical activity after discharge. The type of physical activity delivered was generally some



281 form of structured exercise or physical recreation targeting individuals. However, descriptions of the  
282 interventions were often incomplete, and interventions appeared to lack systematic development.  
283 There was a notable lack of research on environmental interventions and interventions targeting  
284 healthcare professionals. In the current review, and elsewhere [35], we have observed that the  
285 reporting of interventions is often inadequate. Since adequate reporting of interventions is central  
286 to interpreting study findings and translating effective interventions into practice, we recommend  
287 that researchers use relevant reporting guidelines, such as TIDieR [36], when writing study reports.

288 Research has been conducted in a wide range of countries, including both high-income and low- and  
289 middle-income countries. However, the majority of studies were conducted in European psychiatric  
290 inpatient settings. Given the fact that forensic settings are likely to have a more stable population, in  
291 terms of patients' length of stay, than some other inpatient settings, where patients may stay only a  
292 few days, surprisingly few RCTs have been conducted in forensic settings (n=1).

293 Outcomes collected were mainly mental or physical health-related and the primary outcome was  
294 often not clearly stated. In many studies more than one mental or physical health outcome was  
295 examined, with some of the outcomes being positive and others neutral or negative, leading to  
296 difficulty interpreting the study results. It is important that studies, especially RCTs, clearly state  
297 their primary outcome from the outset to avoid cherry-picking results. Physical activity and health-  
298 related quality of life were rarely included as outcomes; the lack of physical activity outcomes  
299 suggests that increasing levels of physical activity was not the primary objective of many of the  
300 studies.

301

### 302 **Strengths and limitations**

303 This review encompasses a wide range of articles and was conducted rigorously and systematically  
304 following a predefined protocol and existing guidance for scoping reviews. It provides a

305 comprehensive overview of the extent and type of research on physical activity in inpatient mental  
306 health services and identifies important gaps in the literature.

307 Although a systematic search was conducted, some eligible articles might have been missed. The  
308 review is also limited to English language articles and does not include grey literature. Although a  
309 scoping review was appropriate to meet the objectives of this study, it is subject to limitations that  
310 are typical of this approach. For example, it did not permit a quality assessment of the included  
311 studies. It was also limited in its capacity to conclude what factors affect participation in physical  
312 activity among adult users of inpatient mental health services, what interventions are effective, and  
313 what themes recur in the qualitative literature.

314

#### 315 **Recommendations for future research**

316 A 2018 meta-review of the evidence on physical activity as a treatment for SMI made several  
317 research recommendations [9], the following of which are relevant for research in relation to the  
318 inpatient context:

- 319 - More research is needed to establish pragmatic, scalable methods for delivering physical  
320 activity with the ultimate goal of optimising treatment 'reach'.
- 321 - More research is required to ascertain the optimal frequency, intensity, time and type of  
322 physical activity interventions in each inpatient sub-population, acknowledging that these  
323 might vary according to individual needs, preferences and characteristics.
- 324 - More research is needed to explore how specific individual, interpersonal, environmental,  
325 and organisational factors influence the uptake and maintenance of physical activity  
326 interventions when they are implemented in clinical practice.

- 327 - More research is needed to investigate whether sedentary behaviours can be reduced in  
328 inpatients and tease out the importance of reducing sedentary behaviours in structured  
329 exercise interventions.
- 330 - Economic evaluations are required to establish the cost-effectiveness of specific physical  
331 activity interventions.

332 In addition, we believe that more research is needed to develop and test interventions that span the  
333 transition from inpatient to community settings. For example, it would be useful to study longer-  
334 term outcomes, such as the impact of physical activity programmes on rates of readmission to  
335 inpatient mental health facilities. Finally, this scoping review has identified sets of articles that could  
336 be collated for quantitative or qualitative systematic reviews of physical activity in inpatient mental  
337 health services. Researchers conducting such reviews should consider the quality of the studies,  
338 which was beyond the scope of this review, and to consider the variety of populations represented  
339 in these studies.

340

## 341 **Conclusions**

342 In conclusion, this scoping review summarised the extent and type of research on physical activity in  
343 adult users of inpatient mental health services. We identified a modest volume of evidence  
344 regarding correlates of physical activity. A broad range of individual, interpersonal, environmental  
345 and organisational correlates have been reported, but more studies with a longitudinal design are  
346 needed to determine how these and other factors are associated. We also found a large number of  
347 studies reporting on the outcomes of specific physical activity interventions. Most interventions  
348 targeted individuals and involved the delivery of physical activity sessions rather than self-  
349 management interventions. There were very few large-scale RCTs and most studies did not include  
350 physical activity or quality of life outcomes. The findings of this review will help guide further  
351 primary research that is needed to guide clinical practice and policy.

## 352 **Supporting information**

353 **S1 File. Search strategy.**

354 **S2 File. Reference list of included reports.**

355

## 356 **References**

- 357 1. Correll CU, Solmi M, Veronese N, Bortolato B, Rosson S, Santonastaso P, et al. Prevalence,  
358 incidence and mortality from cardiovascular disease in patients with pooled and specific  
359 severe mental illness: a large-scale meta-analysis of 3,211,768 patients and 113,383,368  
360 controls. *World Psychiatry*. 2017;16: 163–180. doi:10.1002/wps.20420
- 361 2. Meier SM, Mattheisen M, Mors O, Mortensen PB, Laursen TM, Penninx BW. Increased  
362 mortality among people with anxiety disorders: total population study. *British Journal of*  
363 *Psychiatry*. 2016;209: 216–221. doi:10.1192/bjp.bp.115.171975
- 364 3. Archer G, Kuh D, Hotopf M, Stafford M, Richards M. Association Between Lifetime Affective  
365 Symptoms and Premature Mortality. *JAMA Psychiatry*. 2020;77: 806.  
366 doi:10.1001/jamapsychiatry.2020.0316
- 367 4. Kendler KS, Ohlsson H, Sundquist K, Sundquist J. Drug abuse-associated mortality across the  
368 lifespan: a population-based longitudinal cohort and co-relative analysis. *Soc Psychiatry*  
369 *Psychiatr Epidemiol*. 2017;52: 877–886. doi:10.1007/s00127-017-1398-5
- 370 5. Ringen PA, Falk RS, Antonsen B, Faerden A, Mamen A, Rognli EB, et al. Using motivational  
371 techniques to reduce cardiometabolic risk factors in long term psychiatric inpatients: a  
372 naturalistic interventional study. *BMC Psychiatry*. 2018;18: 255. doi:10.1186/s12888-018-  
373 1832-6
- 374 6. Vancampfort D, Firth J, Schuch FB, Rosenbaum S, Mugisha J, Hallgren M, et al. Sedentary  
375 behavior and physical activity levels in people with schizophrenia, bipolar disorder and major  
376 depressive disorder: a global systematic review and meta-analysis. *World Psychiatry*.  
377 2017;16: 308–315. doi:10.1002/wps.20458
- 378 7. Katzmarzyk PT, Friedenreich C, Shiroma EJ, Lee I-M. Physical inactivity and non-  
379 communicable disease burden in low-income, middle-income and high-income countries. *Br J*  
380 *Sports Med*. 2022;56: 101–106. doi:10.1136/bjsports-2020-103640
- 381 8. Scheewe TW, Backx FJG, Takken T, Jörg F, van Strater ACP, Kroes AG, et al. Exercise therapy  
382 improves mental and physical health in schizophrenia: a randomised controlled trial. *Acta*  
383 *Psychiatr Scand*. 2013;127: 464–473. doi:10.1111/acps.12029
- 384 9. Stubbs B, Vancampfort D, Hallgren M, Firth J, Veronese N, Solmi M, et al. EPA guidance on  
385 physical activity as a treatment for severe mental illness: a meta-review of the evidence and

- 386 Position Statement from the European Psychiatric Association (EPA), supported by the  
387 International Organization of Physical Therapists in Mental Health (IOPTMH). *European*  
388 *Psychiatry*. 2018;54: 124–144. doi:10.1016/j.eurpsy.2018.07.004
- 389 10. Friedrich B, Mason OJ. Qualitative evaluation of a football intervention for people with  
390 mental health problems in the north east of London. *Ment Health Phys Act*. 2018;15: 132–  
391 138. doi:10.1016/j.mhpa.2018.10.002
- 392 11. Pearce M, Garcia L, Abbas A, Strain T, Schuch FB, Golubic R, et al. Association Between  
393 Physical Activity and Risk of Depression. *JAMA Psychiatry*. 2022;79: 550.  
394 doi:10.1001/jamapsychiatry.2022.0609
- 395 12. Kruisdijk F, Deenik J, Tenback D, Tak E, Beekman A-J, van Harten P, et al. Accelerometer-  
396 measured sedentary behaviour and physical activity of inpatients with severe mental illness.  
397 *Psychiatry Res*. 2017;254: 67–74. doi:10.1016/j.psychres.2017.04.035
- 398 13. Nyboe L, Lund H. Low levels of physical activity in patients with severe mental illness. *Nord J*  
399 *Psychiatry*. 2013;67: 43–46. doi:10.3109/08039488.2012.675588
- 400 14. Martland R, Korman N, Firth J, Stubbs B. The efficacy of exercise interventions for all types of  
401 inpatients across mental health settings: A systematic review and meta-analysis of 47 studies.  
402 *J Sports Sci*. 2023;41: 232–271. doi:10.1080/02640414.2023.2207855
- 403 15. Soundy A, Stubbs B, Probst M, Hemmings L, Vancampfort D. Barriers to and Facilitators of  
404 Physical Activity Among Persons With Schizophrenia: A Survey of Physical Therapists.  
405 *Psychiatric Services*. 2014;65: 693–696. doi:10.1176/appi.ps.201300276
- 406 16. Long C, Rowell A, Gayton A, Hodgson E, Dolley O. Tackling obesity and its complications in  
407 secure settings. *Mental Health Review Journal*. 2014;19: 37–46. doi:10.1108/MHRJ-04-2013-  
408 0012
- 409 17. Mateo-Urdiales A, Michael M, Simpson C, Beenstock J. Evaluation of a participatory approach  
410 to improve healthy eating and physical activity in a secure mental health setting. *J Public*  
411 *Ment Health*. 2020;19: 301–309. doi:10.1108/JPMH-11-2019-0090
- 412 18. Firth J, Rosenbaum S, Stubbs B, Gorkzynski P, Yung AR, Vancampfort D. Motivating factors  
413 and barriers towards exercise in severe mental illness: a systematic review and meta-analysis.  
414 *Psychol Med*. 2016;46: 2869–2881. doi:10.1017/S0033291716001732
- 415 19. Gilbert H, Rose D, Slade M. The importance of relationships in mental health care: A  
416 qualitative study of service users' experiences of psychiatric hospital admission in the UK.  
417 *BMC Health Serv Res*. 2008;8: 92. doi:10.1186/1472-6963-8-92
- 418 20. Hassan J, Shannon S, Tully MA, McCartan C, Davidson G, Bunn R, et al. Systematic review of  
419 physical activity interventions assessing physical and mental health outcomes on patients  
420 with severe mental illness (SMI) within secure forensic settings. *J Psychiatr Ment Health Nurs*.  
421 2022;29: 630–646. doi:10.1111/jpm.12832
- 422 21. Rogers E, Kinnafick F-E, Papatthomas A. Physical activity in secure settings: A scoping review of  
423 methods, theory and practise. *Ment Health Phys Act*. 2019;16: 80–95.  
424 doi:10.1016/j.mhpa.2018.11.004

- 425 22. Munn Z, Peters MDJ, Stern C, Tufanaru C, McArthur A, Aromataris E. Systematic review or  
426 scoping review? Guidance for authors when choosing between a systematic or scoping  
427 review approach. *BMC Med Res Methodol*. 2018;18: 143. doi:10.1186/s12874-018-0611-x
- 428 23. Peters MDJ, Godfrey C, McInerney P, Munn Z, Tricco AC, Khalil H. Chapter 11: Scoping  
429 Reviews (2020 version). . In: *JBI Manual for Evidence Synthesis*. 2020.
- 430 24. Tricco AC, Lillie E, Zarin W, O'Brien KK, Colquhoun H, Levac D, et al. PRISMA Extension for  
431 Scoping Reviews (PRISMA-ScR): Checklist and Explanation. *Ann Intern Med*. 2018;169: 467–  
432 473. doi:10.7326/M18-0850
- 433 25. Tew G, Peckham E, Ker S, Smith J, Hodgson P, Daniel S. Physical activity in adult users of  
434 inpatient mental health services: a scoping review. In: <https://osf.io/pj6uw/>. 2022.
- 435 26. Caspersen CJ, Powell KE, Christenson GM. Physical activity, exercise, and physical fitness:  
436 definitions and distinctions for health-related research. *Public Health Rep*. 1985;100: 126–31.
- 437 27. Veritas Health Innovation. Covidence systematic review software. Melbourne, Australia;  
438 2022.
- 439 28. JBI template source of evidence details, characteristics and results extraction instrument. In:  
440 <https://jbi-global-wiki.refined.site/space/MANUAL/4687579>. 20 Sep 2022.
- 441 29. Levac D, Colquhoun H, O'Brien KK. Scoping studies: advancing the methodology.  
442 *Implementation Science*. 2010;5: 69. doi:10.1186/1748-5908-5-69
- 443 30. Campbell F, Tricco AC, Munn Z, Pollock D, Saran A, Sutton A, et al. Mapping reviews, scoping  
444 reviews, and evidence and gap maps (EGMs): the same but different— the “Big Picture”  
445 review family. *Syst Rev*. 2023;12: 45. doi:10.1186/s13643-023-02178-5
- 446 31. Golden SD, Earp JAL. Social Ecological Approaches to Individuals and Their Contexts. *Health  
447 Education & Behavior*. 2012;39: 364–372. doi:10.1177/1090198111418634
- 448 32. Bauman AE, Sallis JF, Dzawaltowski DA, Owen N. Toward a better understanding of the  
449 influences on physical activity. *Am J Prev Med*. 2002;23: 5–14. doi:10.1016/S0749-  
450 3797(02)00469-5
- 451 33. Choi J, Lee M, Lee J, Kang D, Choi J-Y. Correlates associated with participation in physical  
452 activity among adults: a systematic review of reviews and update. *BMC Public Health*.  
453 2017;17: 356. doi:10.1186/s12889-017-4255-2
- 454 34. Campbell M, McKenzie JE, Sowden A, Katikireddi SV, Brennan SE, Ellis S, et al. Synthesis  
455 without meta-analysis (SWiM) in systematic reviews: reporting guideline. *BMJ*. 2020; l6890.  
456 doi:10.1136/bmj.l6890
- 457 35. Peckham E, Tew G, Lorimer B, Bailey L, Beeken R, Cooper C, et al. Interventions to increase  
458 physical activity and reduce sedentary behaviour in severe mental ill health: How effective  
459 are they?' - A systematic review. *Ment Health Phys Act*. 2023;25: 100547.  
460 doi:10.1016/j.mhpa.2023.100547
- 461 36. Hoffmann TC, Glasziou PP, Boutron I, Milne R, Perera R, Moher D, et al. Better reporting of  
462 interventions: template for intervention description and replication (TIDieR) checklist and  
463 guide. *BMJ*. 2014;348: g1687–g1687. doi:10.1136/bmj.g1687



### Identification of studies via databases and registers

### Identification of studies via other methods

Identification

Records identified from\*:  
Databases (n = 35,278)

Records removed *before screening*:  
Duplicate records removed  
(n = 8,238)

Records identified from:  
Reviews (n = 198)  
Included studies  
-Reference lists (n = 17)  
-Citation tracking (n = 31)

Screening

Records screened  
(n = 27,040)

Records excluded\*\*  
(n = 26,760)

Reports sought for retrieval  
(n = 280)

Reports not retrieved  
(n = 0)

Reports sought for retrieval  
(n = 246)

Reports not retrieved  
(n = 0)

Reports assessed for eligibility  
(n = 280)

Reports excluded (n = 148):  
Wrong setting (n = 63)  
Wrong study design (n = 57)  
Wrong concept (n = 25)  
Wrong population (n = 3)

Reports assessed for eligibility  
(n = 246)

Reports excluded (n = 168):  
Wrong setting (n = 125)  
Wrong concept (n = 18)  
Wrong study design (n = 16)  
Wrong language (n = 7)  
Wrong population (n = 2)

Included

Studies included in review  
(n = 182)  
Reports of included studies  
(n = 210)

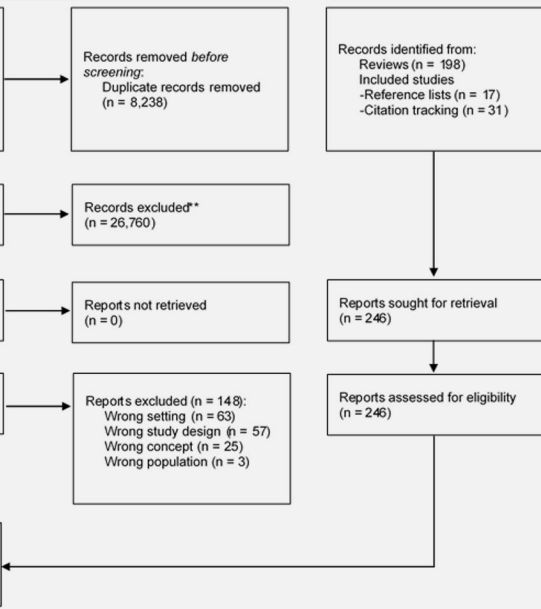

Source: http://medrxiv.org/content/10.1101/2023.10.19.23297222v2.full.pdf
